# Supplementary material for: Combination anti-PD1 and ipilimumab therapy in patients with advanced melanoma and pre-existing autoimmune disorders
Source: PubMed Central journal article supplement — J Immunother Cancer. 2021 May 7;9(5):e002121. doi: 10.1136/jitc-2020-002121 (PMC8108669; doi:10.1136/jitc-2020-002121), 2021-05-07
Supplement: jitc-2020-002121supp001.pdf [file jitc-2020-002121supp001.pdf]

## Supplementary Tables

Supplementary Table 1: Subanalysis of outcomes based on event of flare or irAE

|                                                             | No flare or<br>irAE n =10 (%) | irAE alone<br>n = 27 (%) | Flare alone<br>n = 9 (%) | Flare and irAE<br>n = 9 (%) |
|-------------------------------------------------------------|-------------------------------|--------------------------|--------------------------|-----------------------------|
| <b>Baseline immunosuppression</b>                           | 1 (10%)                       | 4 (15%)                  | 4 (44%)                  | 4 (44%)                     |
| Steroids                                                    | 1                             | 2                        | 2                        | 1                           |
| SSA <sup>#</sup>                                            | 0                             | 1                        | 1                        | 1                           |
| Steroids + SSA                                              | 0                             | 1                        | 1                        | 2                           |
| <b>None</b>                                                 | 9 (90%)                       | 23 (85%)                 | 5 (56%)                  | 5 (56%)                     |
| <b>Management of Events during<br/>combination IO</b>       |                               |                          |                          |                             |
| Steroids                                                    | 0                             | 19 (70%)                 | 7 (78%)                  | 8 (89%)                     |
| SSA+Steroids                                                | 0                             | 9                        | 5                        | 7                           |
| IVIg/Plasmapheresis                                         | 0                             | 8                        | 2                        | 1                           |
|                                                             | 0                             | 2                        | 0                        | 0                           |
| <b>Number alive at time of analysis</b>                     | 6 (60%)                       | 19 (70%)                 | 6 (67%)                  | 7 (78%)                     |
| <b>Number with ongoing response at<br/>time of analysis</b> | 2 (20%)                       | 12 (44%)                 | 4 (44%)                  | 4 (44%)                     |

<sup>#</sup> SSA = Steroid sparing agent

**Supplementary Table 2:** Baseline Characteristics and outcomes of Complete Responders

| Demographics                                | No. (%)   | Detail                                                                   |
|---------------------------------------------|-----------|--------------------------------------------------------------------------|
| <b>Gender</b>                               |           |                                                                          |
| Male                                        | 6 (43%)   |                                                                          |
| Female                                      | 8 (57%)   |                                                                          |
| <b>ECOG 0</b>                               | 14 (100%) |                                                                          |
| <b>AJCC Stage</b>                           |           |                                                                          |
| III                                         | 3         |                                                                          |
| M1a/M1b                                     | 2         |                                                                          |
| M1c                                         | 4         |                                                                          |
| M1d                                         | 5         |                                                                          |
| <b>Mutation Status</b>                      |           |                                                                          |
| BRAF/NRAS Wild Type                         | 2 (14%)   |                                                                          |
| BRAF                                        | 9 (64%)   |                                                                          |
| NRAS                                        | 3 (21%)   |                                                                          |
| <b>Drugs received</b>                       |           |                                                                          |
| Ipilimumab 3mg/kg +<br>Nivolumab 1mg/kg     | 10 (71%)  |                                                                          |
| Ipilimumab 1mg/kg +<br>Pembrolizumab 2mg/kg | 4 (29%)   |                                                                          |
| <b>Autoimmune disorder (AD)*</b>            |           |                                                                          |
| Rheumatologic                               | 1 (7%)    | Polymyalgia – 1,                                                         |
| Gastrointestinal                            | 1 (7%)    | Ulcerative colitis – 1                                                   |
| Endocrine                                   | 7 (50%)   | Grave's disease – 2, Hashimoto's thyroiditis – 4,<br>Type I Diabetes – 1 |
| Dermatologic                                | 3 (21%)   | Psoriasis – 3                                                            |
| Haematologic                                | 1 (7%)    | ITP – 1                                                                  |
| Other                                       | 1 (7%)    | Sarcoidosis – 1                                                          |
| <b>Activity of AD</b>                       |           |                                                                          |
| Clinically active                           | 2 (14%)   |                                                                          |
| Not clinically active                       | 12 (86%)  |                                                                          |
| <b>Immunosuppression</b>                    |           |                                                                          |
| Corticosteroids                             | 2 (24%)   |                                                                          |
| SSA <sup>#</sup>                            | 0 (0%)    |                                                                          |
| Corticosteroids + SSA <sup>#</sup>          | 0 (0%)    |                                                                          |
| <b>No immunosuppression</b>                 | 12 (76%)  |                                                                          |
| <b>Flare of Autoimmune Disease</b>          |           |                                                                          |
| <b>No</b>                                   | 11 (79%)  |                                                                          |
| <b>Yes</b>                                  | 3 (21%)   | Psoriasis, Polymyalgia, Ulcerative colitis                               |
| <b>Immunosuppression for AD flare</b>       |           |                                                                          |
| IV steroids                                 | 1 (33%)   | Ulcerative colitis – 1                                                   |
| Steroids and SSA <sup>#</sup>               | 2 (67%)   | Cyclosporin – 1 for psoriasis, sulfasalazine – 1 for<br>polymyalgia      |

**IO Dosing after flare**

|                     |         |                                |
|---------------------|---------|--------------------------------|
| Both drugs ceased   | 1 (33%) | Ulcerative colitis – 1         |
| PD1 alone continued | 0       |                                |
| Both continued      | 2 (67%) | Psoriasis – 1, Polymyalgia – 1 |

<sup>#</sup> SSA = Steroid sparing agent

**Supplementary Table 3: irAE outcomes of Complete Responders**

| Demographics                      | No. (%)  | Detail                                                                              |
|-----------------------------------|----------|-------------------------------------------------------------------------------------|
| <b>irAE</b>                       |          |                                                                                     |
| No                                | 2 (14%)  |                                                                                     |
| Yes                               | 12 (86%) |                                                                                     |
| <b>irAE Grade</b>                 |          |                                                                                     |
| G1,2                              | 5 (42%)  | Colitis, Hepatitis, Hypophysitis, Thyroiditis, T1 Diabetes                          |
| G3                                | 4 (33%)  | Colitis – 1, Hepatitis – 2, Colitis + Hepatitis – 1<br>Pneumonitis – 2, Thyroiditis |
| G4                                | 3 (42%)  | Colitis, Hepatitis, Myasthenia Gravis                                               |
| <b>Immunosuppression for irAE</b> | 9 (64%)  |                                                                                     |
| Oral steroids                     | 1 (8%)   | Hepatitis                                                                           |
| IV steroids                       | 1 (8%)   | Hepatitis                                                                           |
| Steroid and SSA <sup>#</sup>      | 6 (67%)  | Colitis – 3, Hepatitis – 2, Colitis + Hepatitis – 1                                 |
| Plasmapheresis                    | 1 (8%)   | Myasthenia Gravis                                                                   |

<sup>#</sup>SSA = Steroid sparing agent

**Supplementary Table 4:** Outcomes of Endocrine Autoimmune Disorders vs. Non-Endocrine Autoimmune disorders

|                                     | Endocrine Autoimmune Disorder*<br>n = 19 | Non-endocrine Autoimmune Disorder n = 36 |
|-------------------------------------|------------------------------------------|------------------------------------------|
| <b>Total flare events</b>           | 3/19 (16%)                               | 15/36 (42%)                              |
| Flare of autoimmune disorder        | 2/19 (11%)                               | 7/36 (19%)                               |
| Both irAE and flare                 | 1/19 (5%)                                | 8/36 (22%)                               |
| <b>Neither</b>                      | 8/19 (42%)                               | 5/36 (14%)                               |
| <b>Immune related adverse event</b> | 8/19 (42%)                               | 16/36 (44%)                              |
| <b>Median OS</b>                    | 35 months<br>(95% CI 21.72 – 48.28)      | 22 months<br>(95% CI 9.32 – 34.68)       |
| <b>Median PFS</b>                   | 36 months<br>(95% CI 28.36 – 57.87)      | 7 months<br>(95% 1.94 – 12.06)           |

\*Including endocrine only disorders. Not patients that had an additional autoimmune condition that was not affecting the endocrine system
